# Supplementary material
Source: publisher figshare collection journal article supplement (https://rs.figshare.com/ndownloader/files/17631506)
Supplement: Supplementary file 1 [file 17631506]

subject_id	color_bk	color_simner	inducer	inducer_is_1i
3	Purple	Purple	M	TRUE
3	Green	LightGreen	E	FALSE
3	Blue	Cyan	R	FALSE
3	Red	Red	B	FALSE
3	Green	LightGreen	A	FALSE
3	Green	LightGreen	Y	FALSE
4	Blue	DarkBlue	K	TRUE
4	Brown	Brown	E	FALSE
4	Pink	Pink	R	FALSE
4	Purple	Purple	B	FALSE
4	Pink	Pink	A	FALSE
4	Red	Red	Y	FALSE
6	Pink	Pink	L	TRUE
6	Yellow	Yellow	E	FALSE
6	Red	Red	R	FALSE
6	Blue	DarkBlue	B	FALSE
6	Orange	Orange	A	FALSE
6	Purple	Purple	Y	FALSE
7	Blue	DarkBlue	E	TRUE
7	Orange	Orange	A	FALSE
7	Blue	Cyan	R	FALSE
7	Green	DarkGreen	B	FALSE
7	White	White	T	FALSE
7	Yellow	Yellow	Y	FALSE
8	Pink	Pink	C	TRUE
8	Blue	Cyan	E	FALSE
8	Yellow	Yellow	R	FALSE
8	Green	DarkGreen	B	FALSE
8	Orange	Orange	A	FALSE
8	Orange	Orange	Y	FALSE
9	Yellow	Yellow	N	TRUE
9	Green	LightGreen	E	FALSE
9	Purple	Purple	R	FALSE
9	Blue	Cyan	B	FALSE
9	Blue	Cyan	A	FALSE
9	Red	Red	Y	FALSE
10	Green	DarkGreen	J	TRUE
10	Blue	Cyan	E	FALSE
10	Orange	Orange	R	FALSE
10	Blue	DarkBlue	B	FALSE
10	Purple	Purple	A	FALSE
10	Brown	Brown	Y	FALSE
11	Pink	Pink	K	TRUE
11	Purple	Purple	E	FALSE
11	Red	Red	R	FALSE
11	Blue	DarkBlue	B	FALSE
11	Green	LightGreen	A	FALSE
11	Brown	Brown	Y	FALSE
12	Green	LightGreen	K	TRUE
12	Blue	Cyan	E	FALSE
12	Brown	Brown	R	FALSE
12	Brown	Brown	B	FALSE
12	Red	Red	A	FALSE
12	Blue	DarkBlue	Y	FALSE
13	Pink	Pink	S	TRUE
13	White	White	E	FALSE
13	Brown	Brown	R	FALSE
13	Blue	Cyan	B	FALSE
13	Yellow	Yellow	A	FALSE
13	Green	DarkGreen	Y	FALSE
14	Blue	Cyan	V	TRUE
14	Pink	Pink	E	FALSE
14	Yellow	Yellow	R	FALSE
14	Red	Red	B	FALSE
14	Yellow	Yellow	T	FALSE
14	Orange	Orange	A	FALSE
15	Pink	Pink	T	TRUE
15	Orange	Orange	E	FALSE
15	Green	LightGreen	R	FALSE
15	Green	DarkGreen	B	FALSE
15	Red	Red	A	FALSE
15	Brown	Brown	Y	FALSE
16	Purple	Purple	M	TRUE
16	Green	DarkGreen	E	FALSE
16	Pink	Pink	R	FALSE
16	Blue	DarkBlue	B	FALSE
16	Red	Red	A	FALSE
16	Yellow	Yellow	Y	FALSE
17	Red	Red	A	TRUE
17	Blue	Cyan	E	FALSE
17	Orange	Orange	R	FALSE
17	Pink	Pink	B	FALSE
17	Green	LightGreen	T	FALSE
17	Yellow	Yellow	Y	FALSE
19	Blue	Cyan	E	TRUE
19	Purple	Purple	A	FALSE
19	Red	Red	R	FALSE
19	Brown	Brown	B	FALSE
19	Blue	Cyan	T	FALSE
19	Blue	DarkBlue	Y	FALSE
20	Yellow	Yellow	A	TRUE
20	Green	LightGreen	E	FALSE
20	Red	Red	R	FALSE
20	Purple	Purple	B	FALSE
20	Pink	Pink	T	FALSE
20	Blue	Cyan	Y	FALSE
